# Supplementary material for: Cannabis, Psychosis, and Mortality: A Cohort Study of 50,373 Swedish Men
Source: Atypon-hosted journal article supplement (doi:10.1176/appi.ajp.2016.14050637), 2016-04-22
Supplement: appi.ajp.2016.14050637.ds001.pdf [file appi.ajp.2016.14050637.ds001.pdf]

**TABLE S1. Baseline characteristics of initial cohort of 50 373 Swedish males 18–20 years old at conscription (1969–1970)**

| <b>Confounder</b>                        | <b>Level of cannabis use</b> |                      |                           |                            |                             |                              |                         |
|------------------------------------------|------------------------------|----------------------|---------------------------|----------------------------|-----------------------------|------------------------------|-------------------------|
|                                          | <b>Never</b><br>N (%)        | <b>Once</b><br>N (%) | <b>2–4 times</b><br>N (%) | <b>5–10 times</b><br>N (%) | <b>11–50 times</b><br>N (%) | <b>&gt;50 times</b><br>N (%) | <b>Missing</b><br>N (%) |
| <b>Contact with juvenile authorities</b> |                              |                      |                           |                            |                             |                              |                         |
| Never                                    | 30333 (74)                   | 628 (56)             | 779 (52)                  | 369 (43)                   | 272 (37)                    | 202 (23)                     | 2717 (67)               |
| Sometimes                                | 9344 (23)                    | 413 (36)             | 545 (37)                  | 350 (41)                   | 310 (42)                    | 354 (40)                     | 953 (23)                |
| Several times                            | 973 (2)                      | 76 (7)               | 134 (9)                   | 133 (15)                   | 140 (19)                    | 304 (35)                     | 202 (5)                 |
| Missing                                  | 550 (1)                      | 11 (1)               | 27 (2)                    | 12 (1)                     | 13 (2)                      | 18 (2)                       | 211 (5)                 |
| <b>Run away from home</b>                |                              |                      |                           |                            |                             |                              |                         |
| Never                                    | 40002 (97)                   | 1043 (92.4)          | 1329 (89.6)               | 754 (87.3)                 | 595 (81)                    | 611 (69.5)                   | 3704 (90.7)             |
| Once                                     | 676 (1.5)                    | 58 (5.2)             | 100 (6.7)                 | 71 (8.2)                   | 76 (10.3)                   | 136 (15.5)                   | 114 (2.7)               |
| Two or more times                        | 196 (0.5)                    | 18 (1.6)             | 40 (2.7)                  | 32 (3.7)                   | 53 (7.2)                    | 105 (12)                     | 64 (1.6)                |
| Missing                                  | 326 (1)                      | 9 (0.8)              | 16 (1)                    | 7 (0.8)                    | 11 (1.5)                    | 26 (3)                       | 201 (5)                 |
| <b>Truancy</b>                           |                              |                      |                           |                            |                             |                              |                         |
| Occasionally                             | 23782 (57.7)                 | 456 (40.5)           | 530 (36)                  | 282 (33)                   | 197 (27)                    | 180 (20.5)                   | 2058 (50.4)             |
| Once per term                            | 9852 (24)                    | 347 (31)             | 405 (27.4)                | 204 (24)                   | 188 (25)                    | 149 (17)                     | 977 (24)                |
| Once a month                             | 4991 (12.1)                  | 240 (21)             | 390 (26)                  | 265 (31)                   | 213 (29)                    | 291 (33)                     | 587 (14.4)              |
| Once a week                              | 1117 (2.7)                   | 68 (6)               | 136 (9)                   | 100 (11)                   | 122 (17)                    | 237 (27)                     | 189 (4.6)               |
| Missing                                  | 1458 (3.5)                   | 17 (1.5)             | 24 (1.6)                  | 13 (1)                     | 15 (2)                      | 21 (2.5)                     | 272 (6.6)               |
| <b>Solvent abuse</b>                     |                              |                      |                           |                            |                             |                              |                         |
| Never                                    | 37023 (90)                   | 761 (67.7)           | 896 (60)                  | 451 (52)                   | 350 (48)                    | 338 (38.5)                   | 2956 (72)               |
| Once                                     | 2510 (6)                     | 237 (21)             | 285 (19)                  | 157 (18)                   | 105 (14)                    | 138 (16)                     | 271 (7)                 |
| 2–10 times                               | 1072 (2.6)                   | 91 (8)               | 202 (14)                  | 157 (18)                   | 153 (21)                    | 169 (19)                     | 168 (4)                 |
| >10 times                                | 343 (0.8)                    | 35 (3)               | 89 (6)                    | 87 (10)                    | 116 (16)                    | 220 (25)                     | 69 (2)                  |
| Missing                                  | 252 (0.6)                    | 4 (0.3)              | 13 (1)                    | 12 (2)                     | 11 (1)                      | 13 (1.5)                     | 619 (15)                |

(Continued)

**TABLE S1. Continued**

| <b>Confounder</b>                            | <b>Level of cannabis use</b> |                      |                           |                            |                             |                              | <b>Missing</b><br>N (%) |
|----------------------------------------------|------------------------------|----------------------|---------------------------|----------------------------|-----------------------------|------------------------------|-------------------------|
|                                              | <b>Never</b><br>N (%)        | <b>Once</b><br>N (%) | <b>2–4 times</b><br>N (%) | <b>5–10 times</b><br>N (%) | <b>11–50 times</b><br>N (%) | <b>&gt;50 times</b><br>N (%) |                         |
| <b>Risky use of alcohol</b>                  |                              |                      |                           |                            |                             |                              |                         |
| None                                         | 39509 (96)                   | 1027 (91)            | 1286 (87)                 | 699 (81)                   | 571 (78)                    | 629 (72)                     | 3821 (94)               |
| Risky use of alcohol                         | 1691 (4)                     | 101 (9)              | 199 (13)                  | 165 (19)                   | 164 (22)                    | 249 (28)                     | 262 (6)                 |
| <b>Psychiatric diagnosis at conscription</b> |                              |                      |                           |                            |                             |                              |                         |
| None                                         | 38716 (94)                   | 1020 (90)            | 1283 (86)                 | 722 (84)                   | 553 (75)                    | 635 (72)                     | 3692 (90)               |
| Any                                          | 2484 (6)                     | 108 (10)             | 202 (14)                  | 142 (16)                   | 182 (25)                    | 243 (28)                     | 391 (10)                |
| <b>Parents divorced</b>                      |                              |                      |                           |                            |                             |                              |                         |
| No                                           | 36655 (89)                   | 940 (83)             | 1188 (80)                 | 673 (78)                   | 609 (75)                    | 609 (70)                     | 3439 (84)               |
| Yes                                          | 3863 (9)                     | 168 (15)             | 270 (18)                  | 177 (20)                   | 239 (22)                    | 239 (27)                     | 410 (10)                |
| Missing                                      | 682 (2)                      | 20 (2)               | 27 (2)                    | 14 (2)                     | 22 (3)                      | 30 (3)                       | 234 (6)                 |
| <b>Use of other drugs at conscription</b>    |                              |                      |                           |                            |                             |                              |                         |
| Never use                                    | 41191 (99.9)                 | 1110 (98.4)          | 1286 (86.6)               | 594 (68.7)                 | 355 (48.3)                  | 143 (16.3)                   | 3629 (88.8)             |
| Ever use                                     | 9 (0.1)                      | 18 (1.6)             | 199 (13.4)                | 270 (31.3)                 | 380 (51.7)                  | 735 (83.7)                   | 445 (11)                |
| Missing                                      | 0 (0)                        | 0 (0)                | 0 (0)                     | 0 (0)                      | 0 (0)                       | 0 (0)                        | 9 (0.2)                 |
| <b>Smoking</b>                               |                              |                      |                           |                            |                             |                              |                         |
| Nonsmoking                                   | 18427 (45)                   | 205 (18)             | 218 (15)                  | 104 (12)                   | 84 (12)                     | 61 (7)                       | 1375 (34)               |
| 1–5 cigarettes/day                           | 4694 (11.5)                  | 121 (11)             | 172 (11.5)                | 67 (7.7)                   | 45 (6)                      | 56 (6.4)                     | 410 (10)                |
| 6–10 cigarettes/day                          | 8337 (20)                    | 298 (26)             | 359 (24)                  | 221 (25.5)                 | 164 (22)                    | 192 (22)                     | 713 (17)                |
| 11–20 cigarettes/day                         | 8391 (20)                    | 425 (38)             | 612 (41)                  | 387 (45)                   | 347 (47)                    | 406 (46)                     | 806 (20)                |
| >20 cigarettes/Day                           | 1141 (3)                     | 72 (6.4)             | 112 (7.5)                 | 74 (8.5)                   | 81 (11)                     | 149 (17)                     | 165 (4)                 |
| Missing                                      | 210 (0.5)                    | 7 (0.6)              | 12 (1)                    | 11 (1.3)                   | 14 (2)                      | 14 (1.6)                     | 614 (15)                |

*(Continued)*

**TABLE S1. Continued**

| <b>Confounder</b>               | <b>Level of cannabis use</b> |                      |                           |                            |                             |                              |                         |
|---------------------------------|------------------------------|----------------------|---------------------------|----------------------------|-----------------------------|------------------------------|-------------------------|
|                                 | <b>Never</b><br>N (%)        | <b>Once</b><br>N (%) | <b>2–4 times</b><br>N (%) | <b>5–10 times</b><br>N (%) | <b>11–50 times</b><br>N (%) | <b>&gt;50 times</b><br>N (%) | <b>Missing</b><br>N (%) |
| <b>Use of intravenous drugs</b> |                              |                      |                           |                            |                             |                              |                         |
| Never                           | 41198 (99.9)                 | 1123 (99.5)          | 1457 (98.1)               | 821 (95)                   | 649 (88)                    | 572 (65)                     | 3940 (96)               |
| Once                            | 1 (0.05)                     | 3 (0.3)              | 22 (1.5)                  | 22 (2.5)                   | 51 (7)                      | 71 (8)                       | 98 (2.5)                |
| Several times                   | 1 (0.05)                     | 2 (0.2)              | 6 (0.4)                   | 21 (2.5)                   | 35 (5)                      | 235 (27)                     | 32 (1)                  |
| Missing                         | 0 (0)                        | 0 (0)                | 0 (0)                     | 0 (0)                      | 0 (0)                       | 0 (0)                        | 13 (0.5)                |

**TABLE S2. Causes of death in the cohort by reported cannabis use**

| Cause of death                                                  | Total no. of deaths | Level of cannabis use |        |                  |        |       |           |        |       |
|-----------------------------------------------------------------|---------------------|-----------------------|--------|------------------|--------|-------|-----------|--------|-------|
|                                                                 |                     | Never                 |        | Once to 50 times |        |       | >50 times |        |       |
|                                                                 |                     | N                     | (%)    | N                | (%)    | p*    | N         | (%)    | p**   |
| Infections                                                      | 47                  | 37                    | (1)    | 3                | (0.7)  | 0.4   | 7         | (3.6)  | <0.01 |
| Cancer                                                          | 1033                | 892                   | (27.3) | 99               | (21)   | <0.01 | 42        | (21.9) | 0.1   |
| Endocrine                                                       | 78                  | 67                    | (2)    | 7                | (1.5)  | 0.6   | 4         | (2.0)  | 0.8   |
| Nervous system                                                  | 98                  | 87                    | (2.6)  | 10               | (2)    | 0.6   | 1         | (0.5)  | -     |
| Cardiovascular                                                  | 590                 | 504                   | (15.4) | 67               | (14.5) | 0.6   | 19        | (9.9)  | 0.03  |
| Cerebrovascular                                                 | 150                 | 131                   | (4)    | 14               | (3)    | 0.3   | 5         | (2.6)  | 0.4   |
| Respiratory                                                     | 116                 | 96                    | (2.9)  | 14               | (3)    | 0.8   | 6         | (3.1)  | 0.8   |
| Gastrointestinal                                                | 214                 | 160                   | (4.9)  | 37               | (8)    | 0.05  | 17        | (8.9)  | 0.06  |
| Injuries/accidents                                              | 487                 | 393                   | (12)   | 76               | (17)   | <0.01 | 18        | (9.4)  | 0.3   |
| Suicide                                                         | 496                 | 422                   | (13)   | 52               | (11.3) | 0.3   | 22        | (11.5) | 0.6   |
| Injury undetermined whether accidentally or purposely inflicted | 143                 | 101                   | (3)    | 23               | (5)    | 0.03  | 19        | (9.9)  | <0.01 |
| Other causes                                                    | 466                 | 377                   | (11.5) | 58               | (13)   | 0.5   | 31        | (16.2) | 0.06  |

\*Never users versus moderate users (1 to 50 times).

\*\*Never users versus heavy users (>50 times).

**TABLE S3. Overall mortality among subjects reporting ever use versus never use of cannabis**

|                            |       | All subjects |               | Excluding subjects with a history of tobacco smoking |               | Excluding subjects with a history of risky use of alcohol |               | Excluding subjects with a history of tobacco smoking and risky use of alcohol |               |
|----------------------------|-------|--------------|---------------|------------------------------------------------------|---------------|-----------------------------------------------------------|---------------|-------------------------------------------------------------------------------|---------------|
|                            |       | No of deaths | HR            | No of deaths                                         | HR            | No of deaths                                              | HR            | No of deaths                                                                  | HR            |
| <b>Total no of persons</b> |       |              |               |                                                      |               |                                                           |               |                                                                               |               |
| Never users                | 40359 | 3267         | 1             | 1079                                                 | 1             | 3037                                                      | 1             | 1042                                                                          | 1             |
| Ever users                 | 5016  | 651          | 1.6 (1.5–1.8) | 61                                                   | 1.6 (1.2–2.0) | 475                                                       | 1.5 (1.3–1.6) | 51                                                                            | 1.4 (1.1–1.9) |
